# Supplementary material
Source: PubMed Central journal article supplement (PMC8258756)
Supplement: NIHMS1650325-supplement-1.pdf [file NIHMS1650325-supplement-1.pdf]

## Online Appendix

### Appendix 1

#### CARDIA genotype filtering and imputation

For the CARDIA GENEVA sub-study, the Beaglecall dataset on dbGaP was used, and samples with a call rate <95% and variants with minor allele frequency <1% were removed. Genotype information for the CARDIA CARE sub-study was filtered to remove samples with a call rate <95% and observed heterozygosity >3 standard deviations from the mean. Variants with minor allele frequency <1% or call rate <95% were removed. Filtered data from both sub-studies was further imputed with the Michigan Imputation Server v1.2.1, using the 1000 Genomes phase 3 v5 reference panel and phased with Eagle v2.4 (36). Self-identified related individuals were removed.

**Online Table 1.** 142 SNPs included in GRS. Imp Rsq of ‘---’ indicates SNP was genotyped directly and not imputed for analysis.

|    | rsID        | Chr | Position  | Effect | Non-Effect | OR   | CARDIA<br>GENEVA<br>Effect<br>Allele<br>Freq | CARDIA<br>CARE<br>Effect<br>Allele<br>Freq | MESA<br>Effect<br>Allele<br>Freq | CARDIA<br>GENEVA<br>Imp Rsq | CARDIA<br>CARE<br>Imp Rsq | MESA<br>Imp<br>Rsq |
|----|-------------|-----|-----------|--------|------------|------|----------------------------------------------|--------------------------------------------|----------------------------------|-----------------------------|---------------------------|--------------------|
| 1  | rs61776719  | 1   | 38461319  | A      | C          | 1.04 | 0.516                                        | 0.321                                      | 0.411                            | 0.747                       | 0.744                     | 0.766              |
| 2  | rs56170783  | 1   | 57016131  | A      | C          | 1.11 | 0.913                                        | 0.953                                      | 0.941                            | 0.953                       | 0.789                     | 0.933              |
| 3  | rs7528419   | 1   | 109817192 | A      | G          | 1.11 | 0.777                                        | 0.736                                      | 0.784                            | 0.959                       | 0.93                      | 0.967              |
| 4  | rs11806316  | 1   | 115753482 | G      | A          | 1.04 | 0.613                                        | 0.865                                      | 0.795                            | 0.995                       | 0.992                     | 0.996              |
| 5  | rs11810571  | 1   | 151762308 | G      | C          | 1.07 | 0.836                                        | 0.587                                      | 0.676                            | 0.885                       | 0.971                     | 0.998              |
| 6  | rs6689306   | 1   | 154395946 | A      | G          | 1.05 | 0.432                                        | 0.332                                      | 0.370                            | 0.959                       | 0.877                     | 0.948              |
| 7  | rs1892094   | 1   | 169094459 | C      | T          | 1.04 | 0.484                                        | 0.753                                      | 0.645                            | ---                         | ---                       | ---                |
| 8  | rs6700559   | 1   | 200646073 | C      | T          | 1.04 | 0.530                                        | 0.689                                      | 0.564                            | ---                         | ---                       | ---                |
| 9  | rs2820315   | 1   | 201872264 | T      | C          | 1.05 | 0.304                                        | 0.125                                      | 0.184                            | ---                         | ---                       | ---                |
| 10 | rs60154123  | 1   | 210468999 | T      | C          | 1.04 | 0.152                                        | 0.051                                      | 0.157                            | 0.972                       | 0.97                      | 0.977              |
| 11 | rs67180937  | 1   | 222823743 | G      | T          | 1.07 | 0.708                                        | 0.317                                      | 0.500                            | 0.931                       | 0.976                     | 1.000              |
| 12 | rs699       | 1   | 230845794 | G      | A          | 1.04 | 0.418                                        | 0.74                                       | 0.648                            | 0.984                       | 0.956                     | 0.983              |
| 13 | rs16986953  | 2   | 19942473  | A      | G          | 1.11 | 0.072                                        | 0.13                                       | 0.143                            | 0.969                       | 0.943                     | 0.943              |
| 14 | rs585967    | 2   | 21270554  | C      | A          | 1.07 | 0.833                                        | 0.717                                      | 0.816                            | 0.908                       | 0.952                     | 0.982              |
| 15 | rs4299376   | 2   | 44072576  | G      | T          | 1.06 | 0.306                                        | 0.191                                      | 0.211                            | 0.625                       | 0.926                     | 0.975              |
| 16 | rs582384    | 2   | 45896437  | A      | C          | 1.03 | 0.558                                        | 0.211                                      | 0.387                            | 0.87                        | 0.86                      | 0.888              |
| 17 | rs7568458   | 2   | 85788175  | A      | T          | 1.06 | 0.451                                        | 0.642                                      | 0.499                            | 0.969                       | 0.973                     | 0.989              |
| 18 | rs17678683  | 2   | 145286559 | G      | T          | 1.08 | 0.085                                        | 0.031                                      | 0.062                            | ---                         | ---                       | ---                |
| 19 | rs12999907  | 2   | 164957251 | A      | G          | 1.06 | 0.810                                        | 0.844                                      | 0.818                            | 0.975                       | 0.933                     | 0.952              |
| 20 | rs840616    | 2   | 188196469 | C      | T          | 1.04 | 0.638                                        | 0.373                                      | 0.561                            | ---                         | ---                       | ---                |
| 21 | rs114123510 | 2   | 203831212 | A      | T          | 1.13 | 0.127                                        | 0.051                                      | 0.075                            | 0.992                       | 0.973                     | 0.981              |

|    |             |   |           |      |    |      |       |       |       |       |       |       |
|----|-------------|---|-----------|------|----|------|-------|-------|-------|-------|-------|-------|
| 22 | rs17517928  | 2 | 216291359 | C    | T  | 1.06 | 0.756 | 0.783 | 0.796 | 0.976 | 0.958 | 0.961 |
| 23 | rs2571445   | 2 | 218683154 | A    | G  | 1.05 | 0.382 | 0.275 | 0.315 | 0.940 | 0.882 | 0.948 |
| 24 | rs2972146   | 2 | 227100698 | T    | G  | 1.06 | 0.635 | 0.798 | 0.773 | 0.961 | 0.926 | 0.997 |
| 25 | rs13003675  | 2 | 233584109 | T    | C  | 1.04 | 0.327 | 0.26  | 0.293 | 0.979 | 0.974 | 0.997 |
| 26 | rs11677932  | 2 | 238223955 | G    | A  | 1.03 | 0.694 | 0.789 | 0.736 | 0.915 | 0.931 | 0.937 |
| 27 | rs748431    | 3 | 14928077  | G    | T  | 1.05 | 0.406 | 0.333 | 0.409 | 0.974 | 0.964 | 0.983 |
| 28 | rs7633770   | 3 | 46688562  | A    | G  | 1.03 | 0.414 | 0.217 | 0.283 | 0.968 | 0.941 | 0.971 |
| 29 | rs7617773   | 3 | 48193515  | T    | C  | 1.04 | 0.612 | 0.758 | 0.694 | 0.842 | 0.887 | 0.968 |
| 30 | rs7623687   | 3 | 49448566  | A    | C  | 1.08 | 0.860 | 0.857 | 0.883 | 0.892 | 0.945 | 0.952 |
| 31 | rs17843797  | 3 | 124453022 | G    | T  | 1.07 | 0.115 | 0.062 | 0.091 | 0.994 | 0.981 | 0.996 |
| 32 | rs10512861  | 3 | 132257961 | G    | T  | 1.04 | 0.848 | 0.718 | 0.787 | 0.998 | 0.984 | 0.994 |
| 33 | rs667920    | 3 | 136069472 | T    | G  | 1.05 | 0.770 | 0.757 | 0.775 | 0.973 | 0.975 | 0.994 |
| 34 | rs139016349 | 3 | 138099161 | TTTC | T  | 1.08 | 0.164 | 0.325 | 0.215 | 0.993 | 0.979 | 0.992 |
| 35 | rs12493885  | 3 | 153839866 | C    | G  | 1.08 | 0.864 | 0.942 | 0.939 | 0.886 | 0.835 | 0.996 |
| 36 | rs4266144   | 3 | 156852592 | G    | C  | 1.03 | 0.324 | 0.301 | 0.388 | 0.894 | 0.966 | 0.991 |
| 37 | rs12897     | 3 | 172115902 | G    | A  | 1.04 | 0.393 | 0.739 | 0.582 | 0.81  | 0.84  | 0.864 |
| 38 | rs72627509  | 4 | 57839051  | G    | C  | 1.06 | 0.189 | 0.127 | 0.194 | 0.981 | 0.969 | 0.985 |
| 39 | rs12500824  | 4 | 77416627  | A    | G  | 1.04 | 0.362 | 0.552 | 0.431 | 0.982 | 0.985 | 0.996 |
| 40 | rs11099493  | 4 | 82587050  | A    | G  | 1.04 | 0.681 | 0.830 | 0.757 | 0.770 | 0.744 | 0.800 |
| 41 | rs3775058   | 4 | 96117371  | A    | T  | 1.04 | 0.213 | 0.301 | 0.255 | ---   | ---   | ---   |
| 42 | rs11723436  | 4 | 120901336 | G    | A  | 1.05 | 0.316 | 0.165 | 0.225 | 0.922 | 0.904 | 0.968 |
| 43 | rs35879803  | 4 | 146782837 | C    | A  | 1.05 | 0.651 | 0.668 | 0.729 | 0.969 | 0.92  | 0.964 |
| 44 | rs6841581   | 4 | 148401190 | A    | G  | 1.07 | 0.157 | 0.255 | 0.201 | ---   | ---   | ---   |
| 45 | rs2306556   | 4 | 156638573 | A    | G  | 1.07 | 0.814 | 0.915 | 0.848 | ---   | ---   | ---   |
| 46 | rs7696431   | 4 | 169687725 | T    | G  | 1.04 | 0.530 | 0.410 | 0.418 | 0.909 | 0.955 | 0.99  |
| 47 | rs1508798   | 5 | 9556694   | T    | C  | 1.05 | 0.813 | 0.808 | 0.815 | ---   | ---   | ---   |
| 48 | rs3936511   | 5 | 55860781  | G    | A  | 1.04 | 0.169 | 0.128 | 0.155 | 0.824 | 0.908 | 0.96  |
| 49 | rs1800449   | 5 | 121413208 | T    | C  | 1.07 | 0.176 | 0.167 | 0.174 | 0.915 | 0.878 | 0.934 |
| 50 | rs77335401  | 5 | 131759825 | C    | T  | 1.05 | 0.111 | 0.040 | 0.074 | 0.968 | 0.949 | 0.959 |
| 51 | rs246600    | 5 | 142516897 | T    | C  | 1.04 | 0.466 | 0.347 | 0.359 | ---   | ---   | ---   |
| 52 | rs742115    | 6 | 11327021  | C    | T  | 1.04 | 0.489 | 0.334 | 0.381 | 0.894 | 0.838 | 0.88  |
| 53 | rs9349379   | 6 | 12903957  | G    | A  | 1.11 | 0.420 | 0.136 | 0.324 | 0.883 | 0.865 | 0.855 |
| 54 | rs35541991  | 6 | 22583856  | C    | CA | 1.05 | 0.343 | 0.201 | 0.279 | 0.997 | 0.995 | 0.998 |
| 55 | rs3130683   | 6 | 31888367  | T    | C  | 1.08 | 0.859 | 0.944 | 0.936 | 0.924 | 0.807 | 0.964 |
| 56 | rs4472337   | 6 | 34769765  | T    | C  | 1.06 | 0.173 | 0.33  | 0.207 | 0.988 | 0.985 | 0.995 |
| 57 | rs1321309   | 6 | 36638636  | A    | G  | 1.03 | 0.475 | 0.223 | 0.330 | 0.989 | 0.994 | 1.000 |
| 58 | rs56015508  | 6 | 39152041  | C    | A  | 1.06 | 0.781 | 0.895 | 0.840 | 0.868 | 0.941 | 0.985 |
| 59 | rs6905288   | 6 | 43758873  | A    | G  | 1.05 | 0.567 | 0.499 | 0.570 | ---   | ---   | ---   |
| 60 | rs9367716   | 6 | 57160572  | G    | T  | 1.04 | 0.692 | 0.667 | 0.619 | 0.966 | 0.935 | 0.963 |

|    |             |    |           |   |   |      |       |       |       |       |       |       |
|----|-------------|----|-----------|---|---|------|-------|-------|-------|-------|-------|-------|
| 61 | rs4613862   | 6  | 82612271  | A | C | 1.03 | 0.534 | 0.795 | 0.678 | 0.983 | 0.990 | 0.999 |
| 62 | rs1591805   | 6  | 126717064 | A | G | 1.04 | 0.507 | 0.660 | 0.463 | 0.928 | 0.942 | 0.968 |
| 63 | rs12202017  | 6  | 134173151 | A | G | 1.07 | 0.723 | 0.688 | 0.661 | 0.982 | 0.973 | 0.995 |
| 64 | rs17080091  | 6  | 150997401 | C | T | 1.05 | 0.934 | 0.825 | 0.877 | 0.996 | 0.993 | 0.996 |
| 65 | rs10455872  | 6  | 161010118 | G | A | 1.31 | 0.065 | 0.023 | 0.030 | 0.772 | 0.684 | 0.717 |
| 66 | rs10267593  | 7  | 1937261   | G | A | 1.04 | 0.804 | 0.647 | 0.750 | 0.966 | 0.96  | 0.98  |
| 67 | rs11509880  | 7  | 12261911  | A | G | 1.04 | 0.321 | 0.634 | 0.517 | 0.993 | 0.983 | 0.997 |
| 68 | rs2107595   | 7  | 19049388  | A | G | 1.08 | 0.167 | 0.205 | 0.216 | 0.949 | 0.955 | 0.957 |
| 69 | rs112370447 | 7  | 107176780 | T | C | 1.05 | 0.29  | 0.222 | 0.271 | 0.993 | 0.994 | 0.997 |
| 70 | rs975722    | 7  | 117332914 | G | A | 1.03 | 0.394 | 0.761 | 0.540 | ---   | ---   | ---   |
| 71 | rs10237377  | 7  | 139757136 | G | T | 1.05 | 0.647 | 0.353 | 0.459 | 0.838 | 0.907 | 0.986 |
| 72 | rs6997340   | 8  | 18286997  | T | C | 1.04 | 0.303 | 0.448 | 0.393 | 0.742 | ---   | ---   |
| 73 | rs2083636   | 8  | 19865263  | T | G | 1.05 | 0.725 | 0.811 | 0.783 | 0.993 | 0.996 | 0.999 |
| 74 | rs10093110  | 8  | 106565414 | G | A | 1.03 | 0.579 | 0.424 | 0.527 | ---   | ---   | ---   |
| 75 | rs2954029   | 8  | 126490972 | A | T | 1.06 | 0.549 | 0.643 | 0.591 | 0.978 | 0.971 | 0.990 |
| 76 | rs2891168   | 9  | 22098619  | G | A | 1.19 | 0.479 | 0.246 | 0.386 | ---   | ---   | ---   |
| 77 | rs944172    | 9  | 110517794 | C | T | 1.04 | 0.291 | 0.264 | 0.236 | 0.900 | 0.923 | 0.974 |
| 78 | rs111245230 | 9  | 113169775 | C | T | 1.12 | 0.030 | 0.012 | 0.022 | 0.978 | 0.828 | 0.94  |
| 79 | rs885150    | 9  | 124420173 | C | T | 1.04 | 0.245 | 0.089 | 0.18  | 0.961 | 0.966 | 0.992 |
| 80 | rs507666    | 9  | 136149399 | A | G | 1.08 | 0.181 | 0.110 | 0.157 | 0.826 | 0.978 | 0.991 |
| 81 | rs61848342  | 10 | 12303813  | C | T | 1.04 | 0.36  | 0.326 | 0.375 | 0.935 | 0.864 | 0.907 |
| 82 | rs1887318   | 10 | 30321598  | T | C | 1.06 | 0.436 | 0.156 | 0.304 | 0.970 | 0.983 | 0.992 |
| 83 | rs1870634   | 10 | 44480811  | G | T | 1.06 | 0.659 | 0.440 | 0.561 | 0.929 | 0.957 | 0.964 |
| 84 | rs17680741  | 10 | 82251514  | T | C | 1.05 | 0.719 | 0.819 | 0.781 | 0.985 | 0.971 | 0.989 |
| 85 | rs2246942   | 10 | 91004886  | G | A | 1.08 | 0.348 | 0.388 | 0.391 | 0.686 | 0.949 | 0.993 |
| 86 | rs11191416  | 10 | 104604916 | T | G | 1.08 | 0.900 | 0.921 | 0.866 | ---   | ---   | ---   |
| 87 | rs4918072   | 10 | 105693644 | A | G | 1.04 | 0.277 | 0.29  | 0.259 | 0.968 | 0.931 | 0.962 |
| 88 | rs4752700   | 10 | 124237612 | G | A | 1.03 | 0.449 | 0.681 | 0.528 | 0.928 | 0.893 | 0.943 |
| 89 | rs10840293  | 11 | 9751196   | A | G | 1.05 | 0.566 | 0.492 | 0.522 | 0.882 | 0.931 | 0.953 |
| 90 | rs1351525   | 11 | 13301548  | T | A | 1.05 | 0.704 | 0.488 | 0.584 | 0.991 | 0.993 | 1.00  |
| 91 | rs7116641   | 11 | 43696917  | G | T | 1.03 | 0.298 | 0.328 | 0.298 | ---   | ---   | ---   |
| 92 | rs12801636  | 11 | 65391317  | G | A | 1.05 | 0.782 | 0.755 | 0.707 | ---   | ---   | ---   |
| 93 | rs590121    | 11 | 75274150  | T | G | 1.04 | 0.309 | 0.437 | 0.347 | 0.918 | 0.931 | 0.953 |
| 94 | rs7947761   | 11 | 100624599 | G | A | 1.04 | 0.277 | 0.241 | 0.227 | ---   | ---   | ---   |
| 95 | rs2839812   | 11 | 103673294 | T | A | 1.06 | 0.301 | 0.374 | 0.345 | ---   | ---   | ---   |
| 96 | rs964184    | 11 | 116648917 | G | C | 1.05 | 0.135 | 0.205 | 0.212 | 0.966 | ---   | ---   |
| 97 | rs11838267  | 12 | 7175872   | T | C | 1.05 | 0.87  | 0.86  | 0.879 | 0.976 | 0.935 | 0.982 |
| 98 | rs10841443  | 12 | 20220033  | G | C | 1.05 | 0.662 | 0.332 | 0.515 | 0.877 | 0.866 | 0.902 |
| 99 | rs2229357   | 12 | 57843711  | G | A | 1.05 | 0.776 | 0.881 | 0.804 | 0.954 | 0.939 | 0.933 |

|     |             |    |           |       |               |      |       |       |       |       |       |       |
|-----|-------------|----|-----------|-------|---------------|------|-------|-------|-------|-------|-------|-------|
| 100 | rs2681472   | 12 | 90008959  | G     | A             | 1.07 | 0.169 | 0.116 | 0.158 | 0.975 | 0.943 | 0.961 |
| 101 | rs7306455   | 12 | 95355541  | G     | A             | 1.05 | 0.900 | 0.884 | 0.869 | ---   | ---   | ---   |
| 102 | rs10774625  | 12 | 111910219 | A     | G             | 1.07 | 0.489 | 0.133 | 0.268 | 0.633 | 0.846 | 0.906 |
| 103 | rs11830157  | 12 | 118265441 | G     | T             | 1.03 | 0.386 | 0.204 | 0.316 | 0.914 | 0.841 | ---   |
| 104 | rs2244608   | 12 | 121416988 | G     | A             | 1.05 | 0.330 | 0.164 | 0.281 | 0.964 | 0.946 | 0.952 |
| 105 | rs11057401  | 12 | 124427306 | T     | A             | 1.05 | 0.668 | 0.663 | 0.704 | ---   | ---   | ---   |
| 106 | rs1924981   | 13 | 29022645  | T     | C             | 1.05 | 0.337 | 0.287 | 0.288 | 0.897 | 0.876 | 0.906 |
| 107 | rs9591012   | 13 | 33058333  | G     | A             | 1.04 | 0.642 | 0.861 | 0.764 | 0.983 | 0.988 | 1     |
| 108 | rs11617955  | 13 | 110818102 | T     | A             | 1.09 | 0.879 | 0.945 | 0.905 | ---   | ---   | ---   |
| 109 | rs1317507   | 13 | 113631780 | A     | C             | 1.04 | 0.249 | 0.228 | 0.257 | ---   | ---   | ---   |
| 110 | rs2145598   | 14 | 58794001  | G     | A             | 1.03 | 0.442 | 0.594 | 0.476 | 0.897 | 0.909 | 0.947 |
| 111 | rs3832966   | 14 | 75614504  | ACCCG | A             | 1.05 | 0.478 | 0.263 | 0.457 | 0.974 | 0.974 | 0.991 |
| 112 | rs112635299 | 14 | 94838142  | G     | T             | 1.15 | 0.984 | 0.996 | 0.991 | 0.976 | 0.946 | 0.968 |
| 113 | rs6494488   | 15 | 65024204  | A     | G             | 1.05 | 0.817 | 0.389 | 0.68  | 0.793 | 0.935 | 0.967 |
| 114 | rs72743461  | 15 | 67441750  | C     | A             | 1.07 | 0.783 | 0.889 | 0.852 | 0.926 | 0.924 | 0.949 |
| 115 | rs7164479   | 15 | 79123054  | T     | C             | 1.07 | 0.539 | 0.58  | 0.568 | 0.904 | 0.952 | 0.997 |
| 116 | rs2083460   | 15 | 89574484  | T     | C             | 1.07 | 0.917 | 0.417 | 0.61  | 0.944 | 0.94  | 0.988 |
| 117 | rs2071382   | 15 | 91428197  | T     | C             | 1.06 | 0.494 | 0.456 | 0.389 | 0.937 | 0.903 | 0.968 |
| 118 | rs17581137  | 15 | 96146414  | A     | C             | 1.04 | 0.762 | 0.789 | 0.769 | 0.734 | ---   | ---   |
| 119 | rs1050362   | 16 | 72130815  | A     | C             | 1.04 | 0.368 | 0.655 | 0.464 | 0.986 | 0.964 | 0.997 |
| 120 | rs33928862  | 16 | 75308440  | T     | TCAGCCTCCTGAG | 1.05 | 0.535 | 0.291 | 0.465 | 0.838 | 0.887 | 0.894 |
| 121 | rs7199941   | 16 | 81906423  | A     | G             | 1.04 | 0.399 | 0.579 | 0.475 | 0.983 | 0.982 | 0.998 |
| 122 | rs7500448   | 16 | 83045790  | A     | G             | 1.06 | 0.757 | 0.881 | 0.813 | 0.947 | 0.898 | 0.93  |
| 123 | rs113348108 | 17 | 2088848   | C     | CCAGA         | 1.05 | 0.301 | 0.463 | 0.374 | 0.985 | 0.963 | 0.997 |
| 124 | rs9897596   | 17 | 17593453  | T     | C             | 1.04 | 0.485 | 0.382 | 0.507 | 0.972 | 0.945 | 0.977 |
| 125 | rs13723     | 17 | 27941886  | G     | A             | 1.04 | 0.461 | 0.801 | 0.595 | 0.864 | 0.870 | 0.913 |
| 126 | rs76954792  | 17 | 30033514  | T     | C             | 1.04 | 0.212 | 0.087 | 0.156 | 0.687 | 0.920 | 0.943 |
| 127 | rs2074158   | 17 | 40257163  | C     | T             | 1.05 | 0.169 | 0.644 | 0.352 | 0.828 | ---   | ---   |
| 128 | rs17608766  | 17 | 45013271  | C     | T             | 1.06 | 0.137 | 0.040 | 0.067 | 0.822 | 0.851 | 0.841 |
| 129 | rs4643373   | 17 | 47123423  | T     | C             | 1.05 | 0.699 | 0.734 | 0.732 | 0.87  | 0.887 | 0.935 |
| 130 | rs8068952   | 17 | 59286644  | G     | C             | 1.07 | 0.249 | 0.745 | 0.416 | 0.851 | 0.927 | 0.91  |
| 131 | rs1867624   | 17 | 62387091  | T     | C             | 1.04 | 0.617 | 0.685 | 0.677 | ---   | ---   | ---   |
| 132 | rs9964304   | 18 | 47229717  | C     | A             | 1.04 | 0.28  | 0.389 | 0.326 | 0.98  | 0.96  | 0.976 |
| 133 | rs35614134  | 18 | 57832856  | AC    | A             | 1.04 | 0.224 | 0.296 | 0.23  | 0.978 | 0.954 | 0.989 |
| 134 | rs10417115  | 19 | 33386556  | C     | T             | 1.07 | 0.059 | 0.080 | 0.068 | 0.992 | 0.996 | 0.990 |
| 135 | rs138120077 | 19 | 41790086  | G     | GTTATGGTA     | 1.07 | 0.135 | 0.059 | 0.089 | 0.67  | 0.694 | 0.680 |
| 136 | rs867186    | 20 | 33764554  | A     | G             | 1.08 | 0.910 | 0.897 | 0.924 | ---   | ---   | ---   |
| 137 | rs6102343   | 20 | 39924279  | A     | G             | 1.04 | 0.243 | 0.416 | 0.301 | 0.978 | 0.953 | 0.977 |
| 138 | rs3827066   | 20 | 44586023  | T     | C             | 1.04 | 0.152 | 0.064 | 0.107 | 0.956 | 0.931 | 0.964 |

|     |            |    |          |   |   |      |       |       |       |       |       |       |
|-----|------------|----|----------|---|---|------|-------|-------|-------|-------|-------|-------|
| 139 | rs260020   | 20 | 57714025 | T | C | 1.05 | 0.132 | 0.32  | 0.199 | 0.992 | 0.985 | 0.99  |
| 140 | rs2832227  | 21 | 30533076 | G | A | 1.04 | 0.139 | 0.361 | 0.244 | 0.991 | 0.975 | 0.992 |
| 141 | rs28451064 | 21 | 35593827 | A | G | 1.14 | 0.124 | 0.045 | 0.064 | 0.877 | 0.842 | 0.915 |
| 142 | rs180803   | 22 | 24658858 | G | T | 1.18 | 0.991 | 0.898 | 0.951 | 0.878 | 0.963 | 0.944 |

## Appendix 2

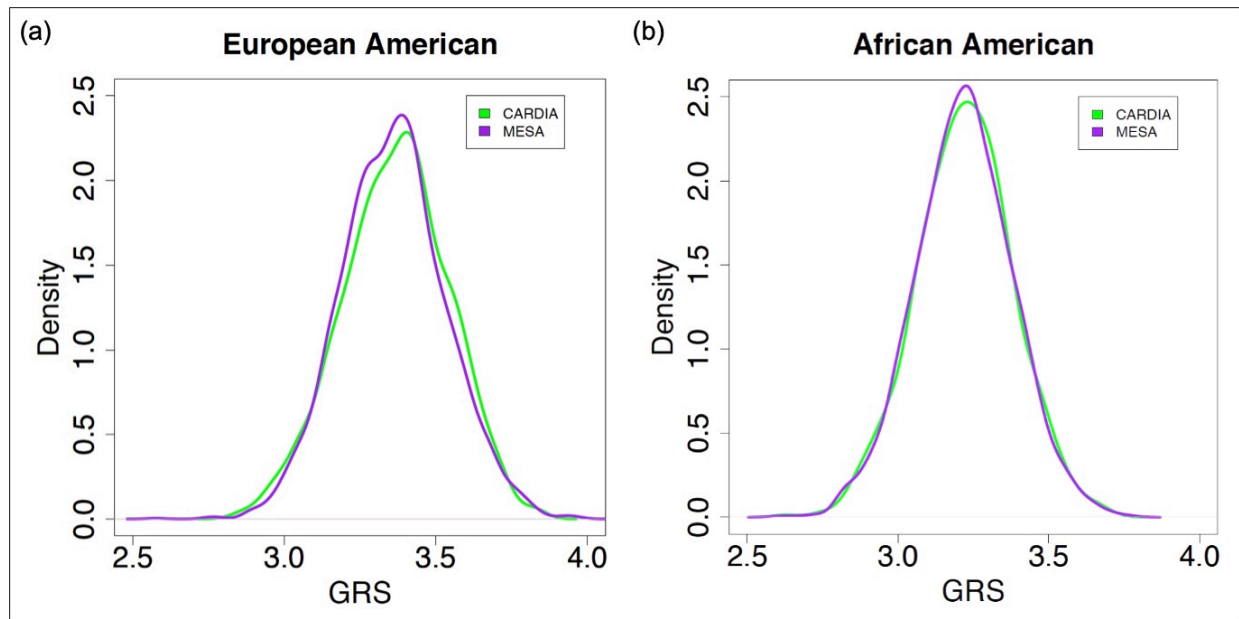

**Online Figure 1.** Distribution of raw GRS in CARDIA and MESA for self-identified (a) European Americans (CARDIA  $n=1251$ , MESA  $n=2647$ ) and (b) African Americans (CARDIA  $n=676$ , MESA  $n=1834$ ).

|                              | Ages 44-54       |                |                 | Ages 55-64       |                 |                 | Ages 65-74       |                 |                 | Ages 75-84      |                 |                 |
|------------------------------|------------------|----------------|-----------------|------------------|-----------------|-----------------|------------------|-----------------|-----------------|-----------------|-----------------|-----------------|
|                              | Total            | Female         | Male            | Total            | Female          | Male            | Total            | Female          | Male            | Total           | Female          | Male            |
| Population                   | 1827             | 967            | 860             | 1908             | 1008            | 900             | 1975             | 1035            | 940             | 935             | 486             | 449             |
| Total people                 | 446              | 149            | 297             | 867              | 340             | 527             | 1284             | 569             | 715             | 762             | 371             | 391             |
| Low GRS: CAC>0/# People (%)  | 64/385 (16.6%)   | 23/208 (11.1%) | 41/177 (23.2%)  | 143/383 (37.3%)  | 56/200 (28.0%)  | 87/183 (47.5%)  | 215/384 (56.0%)  | 79/182 (43.4%)  | 136/202 (67.3%) | 131/178 (73.6%) | 56/88 (63.6%)   | 75/90 (83.3%)   |
| Int GRS: CAC>0/# People (%)  | 251/1061 (23.7%) | 85/560 (15.2%) | 166/501 (33.1%) | 508/1138 (44.6%) | 193/612 (31.5%) | 315/526 (59.9%) | 802/1220 (65.7%) | 362/652 (55.5%) | 440/568 (77.5%) | 464/566 (82.0%) | 224/290 (77.2%) | 240/276 (87.0%) |
| High GRS: CAC>0/# People (%) | 131/381 (34.4%)  | 41/199 (20.6%) | 90/182 (49.5%)  | 216/387 (55.8%)  | 91/196 (46.4%)  | 125/191 (65.4%) | 267/371 (72.0%)  | 128/201 (63.7%) | 139/170 (81.8%) | 167/191 (87.4%) | 91/108 (84.3%)  | 76/83 (91.6%)   |
| Total CAC>0 rate             | 24.4%            | 15.4%          | 34.5%           | 45.4%            | 33.7%           | 58.6%           | 65.0%            | 55.0%           | 76.1%           | 81.5%           | 76.3%           | 87.1%           |
| High/Low                     | 2.07             | 1.86           | 2.13            | 1.49             | 1.67            | 1.38            | 1.29             | 1.47            | 1.21            | 1.19            | 1.32            | 1.1             |

**Online Table 2.** CAC prevalence in 10-year age categories of the MESA cohort stratified into low (GRS quintile 1), intermediate (GRS quintiles 2-4) and high (GRS quintile 5) genetic risk categories. CAC = coronary artery calcium, GRS = genetic risk score

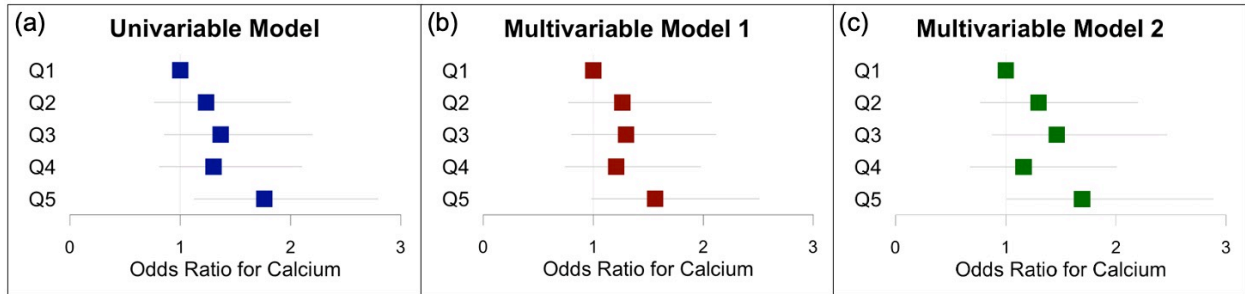

**Online Figure 2.** CAC risk by GRS quintile in CARDIA (aged 32-47, n=1927). Odds ratio for CAC presence by GRS quintile in the CARDIA cohort under an (a) univariable model, (b) multivariable model including age and sex, and (c) multivariable model including age, sex and other traditional clinical variables (diabetes status, smoking status, LDL-c, HDL-c, systolic blood pressure, antihypertensive therapy status, cholesterol medication status, self-identified race) as covariates. The odds ratio for calcium in GRS quintile 5 compared to GRS quintile 1 was 1.76 (1.13-2.79,  $p=0.014$ ), 1.56 (0.98-2.51,  $p=0.061$ ), and 1.69 (1.01-2.88,  $p=0.049$ ) in the univariable model, the multivariable model including age and sex, and the multivariable model including age, sex, and other traditional clinical variables, respectively.

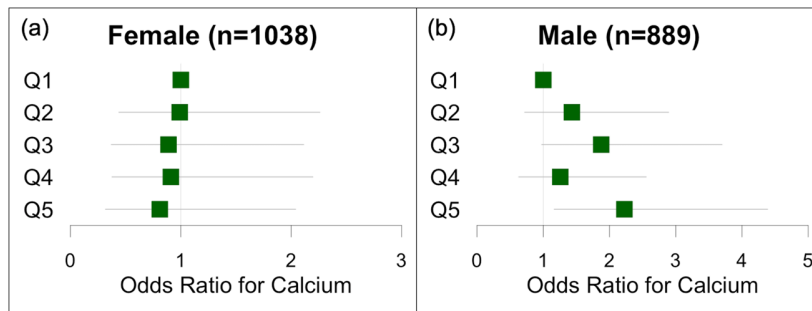

**Online Figure 3.** CAC risk by GRS quintile in CARDIA, stratified by sex. Odds ratio for CAC presence by GRS quintile in the (a) female subpopulation and (b) male subpopulation of the CARDIA cohort under a multivariable model including age and other traditional clinical variables (diabetes status, smoking status, LDL-c, HDL-c, systolic blood pressure, antihypertensive therapy status, cholesterol medication status, self-identified race) as covariates. The odds ratio for calcium was significantly larger in GRS quintile 5 compared to quintile 1 in the male subpopulation but not in the female subpopulation.



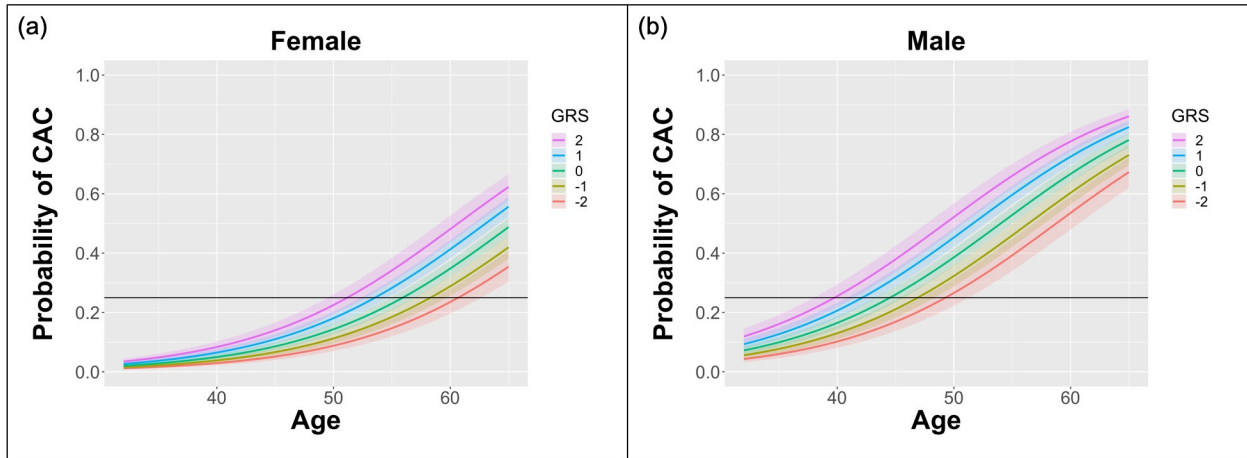

**Online Figure 4.** Probability of CAC as a function of age in analysis of European American participants in the CARDIA and MESA cohorts combined (n=3898). The odds ratio for calcium was 1.30 (1.20-1.41,  $p=2.71E-10$ ) per standard deviation from the European American population mean.

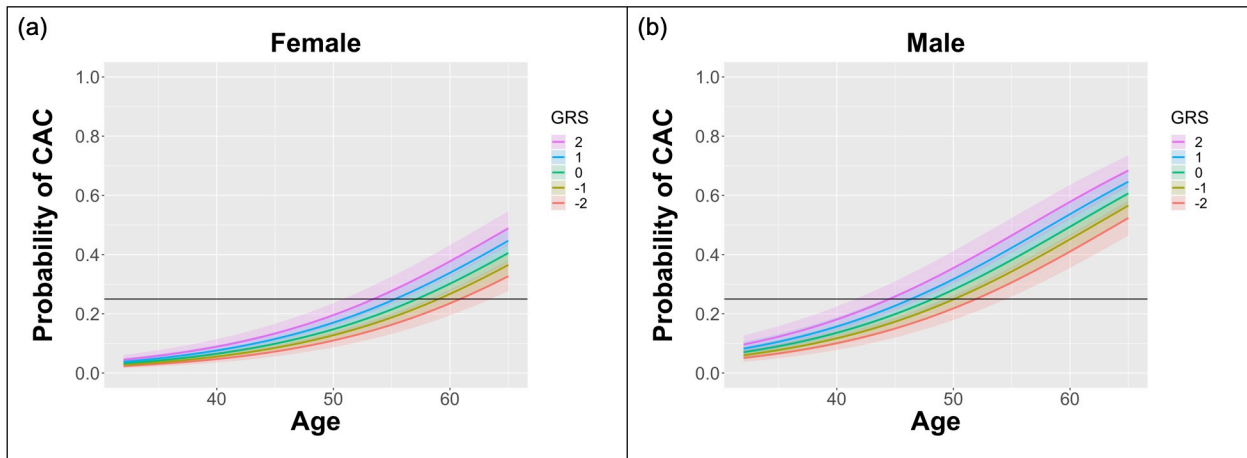

**Online Figure 5.** Probability of CAC as a function of age in analysis of African American participants in the CARDIA and MESA cohorts combined (n=2510). The odds ratio was 1.18 (1.08-1.30,  $p=5.32E-4$ ) per standard deviation from the African American population mean.

| Cohort            | GRS population mean±SD | Sex    | N    | Scanning Equation            | Scan Age High GRS (+2σ) | Scan Age Low GRS (-2σ) |
|-------------------|------------------------|--------|------|------------------------------|-------------------------|------------------------|
| All               | 3.31±0.18              | Female | 4536 | Age[scan] = 56.0 - 2.82*GRSn | 50.5 (48.8, 52.2)       | 61.9 (60.2, 63.5)      |
|                   |                        | Male   | 4051 | Age[scan] = 45.3 - 2.71*GRSn | 40.0 (38.1, 41.8)       | 51.0 (49.2, 52.6)      |
| European American | 3.36±0.17              | Female | 2029 | Age[scan] = 55.3 - 2.38*GRSn | 50.4 (48.0, 52.7)       | 59.8 (57.4, 62.2)      |
|                   |                        | Male   | 1869 | Age[scan] = 44.3 - 2.18*GRSn | 39.8 (37.4, 42.0)       | 48.5 (46.2, 50.7)      |
| African American  | 3.22±0.16              | Female | 1385 | Age[scan] = 57.6 - 1.83*GRSn | 53.8 (50.5, 56.9)       | 61.1 (57.8, 64.4)      |
|                   |                        | Male   | 1125 | Age[scan] = 47.5 - 1.80*GRSn | 43.9 (39.9, 47.6)       | 51.1 (47.2, 54.6)      |

**Online Table 3.** Scanning equations and recommendation for individuals 2 standard deviations above the population mean and 2 standard deviations below the population mean at a 25% non-zero CAC discovery rate. Equations and ages derived using models that included sex-stratified data. GRS = genetic risk score, GRSn = genetic risk score normalized to the population mean

| Variable                    | All MESA Participants (n=5775) |          | FH+ (n=2460) |          | FH- (n=3315) |          |
|-----------------------------|--------------------------------|----------|--------------|----------|--------------|----------|
|                             | Odds Ratio                     | p        | Odds Ratio   | p        | Odds Ratio   | p        |
| Age                         | 1.10                           | <2E-16   | 1.11         | <2E-16   | 1.10         | <2E-16   |
| Sex                         | 3.01                           | <2E-16   | 2.98         | <2E-16   | 3.03         | <2E-16   |
| GRS Q1                      | 1 (ref)                        | N/A      | 1 (ref)      | N/A      | 1 (ref)      | N/A      |
| GRS Q2                      | 1.24                           | 0.025    | 1.21         | 0.20     | 1.27         | 0.062    |
| GRS Q3                      | 1.60                           | 1.42E-06 | 1.40         | 2.53E-02 | 1.76         | 9.60E-06 |
| GRS Q4                      | 1.87                           | 1.56E-10 | 1.68         | 4.71E-04 | 2.03         | 5.35E-08 |
| GRS Q5                      | 2.68                           | <2E-16   | 2.44         | 3.57E-09 | 2.89         | 1.18E-15 |
| 0 Traditional Risk Factors  | 1 (ref)                        | N/A      | 1 (ref)      | N/A      | 1 (ref)      | N/A      |
| 1 Traditional Risk Factor   | 1.48                           | 1.76E-05 | 1.39         | 0.023    | 1.54         | 2.48E-04 |
| 2 Traditional Risk Factors  | 2.09                           | 5.48E-15 | 2.04         | 1.50E-06 | 2.12         | 9.75E-10 |
| >2 Traditional Risk Factors | 3.01                           | <2E-16   | 2.77         | 2.00E-09 | 3.18         | 2.00E-15 |
| Family History              | 1.55                           | 1.73E-12 | N/A          | N/A      | N/A          | N/A      |

**Online Table 4.** Analysis of the family history in combination with traditional risk factors and the GRS in the MESA cohort only. Family history reporting was not consistent between the CARDIA and MESA cohorts. The GRS was predictive of CAC in analysis of all MESA participants with family history reported (n=5775). The GRS remained predictive of CAC in analysis of the MESA cohort stratified by family history status in both individuals who reported family history of an event (n=2460) and in individuals who reported no family history of an event (n=3315).

| a. Females 50-60 years (n=954) |                         |                             |        |      |       |
|--------------------------------|-------------------------|-----------------------------|--------|------|-------|
|                                |                         | Age+sex+traditional RFs+GRS |        |      |       |
| CAC>0<br>(events)              | Age+sex+traditional RFs | <15%                        | 15-35% | >35% | total |
|                                | <15%                    | 12                          | 9      | 0    | 21    |
|                                | 15-35%                  | 11                          | 120    | 24   | 155   |
|                                | >35%                    | 0                           | 11     | 48   | 59    |
|                                | total                   | 23                          | 140    | 72   | 235   |
| CAC<0<br>(nonevents)           | Age+sex+traditional RFs | <15%                        | 15-35% | >35% | total |
|                                | <15%                    | 101                         | 24     | 0    | 125   |
|                                | 15-35%                  | 76                          | 401    | 38   | 515   |
|                                | >35%                    | 0                           | 31     | 48   | 79    |
|                                | total                   | 177                         | 456    | 86   | 719   |

| b. Males 40-50 years n=931 |                         |                             |        |      |       |
|----------------------------|-------------------------|-----------------------------|--------|------|-------|
|                            |                         | Age+sex+traditional RFs+GRS |        |      |       |
| CAC>0<br>(events)          | Age+sex+traditional RFs | <15%                        | 15-35% | >35% | total |
|                            | <15%                    | 8                           | 5      | 0    | 13    |
|                            | 15-35%                  | 18                          | 120    | 38   | 176   |
|                            | >35%                    | 0                           | 13     | 37   | 50    |
|                            | total                   | 26                          | 138    | 75   | 239   |
| CAC<0<br>(nonevents)       | Age+sex+traditional RFs | <15%                        | 15-35% | >35% | total |
|                            | <15%                    | 89                          | 31     | 0    | 120   |
|                            | 15-35%                  | 90                          | 382    | 50   | 522   |
|                            | >35%                    | 0                           | 20     | 30   | 50    |
|                            | total                   | 179                         | 433    | 80   | 692   |

| c. Females 44-54 years (n=1062) |                         |                             |        |      |       |
|---------------------------------|-------------------------|-----------------------------|--------|------|-------|
|                                 |                         | Age+sex+traditional RFs+GRS |        |      |       |
| CAC>0<br>(events)               | Age+sex+traditional RFs | <10%                        | 10-25% | >25% | total |
|                                 | <10%                    | 14                          | 3      | 0    | 17    |
|                                 | 10-25%                  | 8                           | 85     | 14   | 107   |
|                                 | >25%                    | 0                           | 6      | 16   | 22    |
|                                 | total                   | 22                          | 94     | 30   | 146   |
| CAC<0<br>(nonevents)            | Age+sex+traditional RFs | <10%                        | 10-25% | >25% | total |
|                                 | <10%                    | 267                         | 53     | 0    | 320   |
|                                 | 10-25%                  | 105                         | 393    | 31   | 529   |
|                                 | >25%                    | 0                           | 25     | 42   | 67    |
|                                 | total                   | 372                         | 471    | 73   | 916   |

| d. Males 34-44 years (n=699) |                         |                             |        |      |       |
|------------------------------|-------------------------|-----------------------------|--------|------|-------|
|                              |                         | Age+sex+traditional RFs+GRS |        |      |       |
| CAC>0<br>(events)            | Age+sex+traditional RFs | <10%                        | 10-25% | >25% | total |
|                              | <10%                    | 3                           | 2      | 0    | 5     |
|                              | 10-25%                  | 4                           | 63     | 15   | 82    |
|                              | >25%                    | 1                           | 2      | 16   | 19    |
|                              | total                   | 8                           | 67     | 31   | 106   |
| CAC<0<br>(nonevents)         | Age+sex+traditional RFs | <10%                        | 10-25% | >25% | total |
|                              | <10%                    | 70                          | 22     | 0    | 92    |
|                              | 10-25%                  | 79                          | 356    | 33   | 468   |
|                              | >25%                    | 0                           | 5      | 28   | 33    |
|                              | total                   | 149                         | 383    | 61   | 593   |

**Online Tables 5a-5d.** Reclassification tables between (1) a model that included age, sex, and number of traditional risk factors and (2) a model that included age, sex, number of traditional risk factors, and continuous GRS to predict CAC presence. For the 10-year age range over which most individuals cross a 25% probability threshold, (a) females 50-60 and (b) males 40-50, risk thresholds were 15% and 35%. For the youngest 10-year age category with CAC incidence >10%, (c) females 44-54 and (d) males 34-44, risk thresholds were 10% and 25%.

### **Appendix 3**

MESA and the MESA SHARe project are conducted and supported by the National Heart, Lung, and Blood Institute (NHLBI) in collaboration with MESA investigators. Support for MESA is provided by contracts N01-HC-95159, N01-HC-95160, N01-HC-95161, N01-HC-95162, N01-HC-95163, N01-HC-95164, N01-HC-95165, N01-HC-951636, N01-HC-95167, N01-HC-95168, N01-HC-95169, UL1-RR-025005, and UL1-TR-000040.

MESA Family is conducted and supported by the National Heart, Lung, and Blood Institute (NHLBI) in collaboration with MESA investigators. Support is provided by grants and contracts R01HL071051, R01HL071205, R01HL071250, R01HL071251, R01HL071258, R01HL071259, by the National Center for Research Resources, Grant UL1RR033176, and the National Center for Advancing Translational Sciences, Grant UL1TR000124.

This publication was developed under a STAR research assistance agreement, No. RD831697 (MESA Air), awarded by the U.S Environmental protection Agency. It has not been formally reviewed by the EPA. The views expressed in this document are solely those of the authors and the EPA does not endorse any products or commercial services mentioned in this publication.

Funding for SHARe genotyping was provided by NHLBI Contract N02-HL-64278. Genotyping was performed at Affymetrix (Santa Clara, California, USA) and the Broad Institute of Harvard and MIT (Boston, Massachusetts, USA) using the Affymetrix Genome-Wide Human SNP Array 6.0.

This manuscript was not prepared in collaboration with MESA investigators and does not necessarily reflect the opinions or views of MESA, or the NHLBI.
